# Supplementary material for: Complex oscillatory decrease with size in diffusivity of {100}-epitaxially supported 3D fcc metal nanoclusters
Source: Royal Society of Chemistry journal article supplement (doi:10.1039/c9nr05845a), 2019-01-01
Supplement: c9nr05845a2.pdf [file c9nr05845a2.pdf]

ESI MOVIE CAPTION: Diffusion trajectory from KMC simulation for a closed-shell Ag TP with size  $N = 50$  for the case of strong adhesion with  $f = 0.75$  at 900 K.
